# Supplementary material for: A vapor thermal approach to selective recycling of spent lithium-ion batteries
Source: Royal Society of Chemistry journal article supplement (doi:10.1039/d1gc03036a), 2021-01-01
Supplement: d1gc03036a1.pdf [file d1gc03036a1.pdf]

## Supporting information

### **A vapor thermal approach to selectively recycling spent lithium-ion batteries**

Xin Qu<sup>1</sup>, Muya Cai<sup>1</sup>, Beilei Zhang<sup>1</sup>, Hongwei Xie<sup>1</sup>, Lei Guo<sup>2</sup>, Dihua Wang<sup>2</sup>, Huayi Yin<sup>1,2\*</sup>

1. Key Laboratory for Ecological Metallurgy of Multimetallic Mineral of Ministry of Education,

School of metallurgy, Northeastern University, Shenyang, P. R. China, 110819

2. School of Resource and Environmental Science, Wuhan University, 299 Bayi Road, Wuchang

District, Wuhan 430072, P.R. China.

Email: yinhuayi@whu.edu.cn

**Tab. S1** Main components of different types of spent cathode powders.

| Content                                                                | Li (wt%) | Co (wt%) | Ni (wt%) | Mn (wt%) |
|------------------------------------------------------------------------|----------|----------|----------|----------|
| Commerce LiCoO <sub>2</sub>                                            | 6.69     | 57.12    |          |          |
| Commerce                                                               |          |          |          |          |
| LiNi <sub>0.6</sub> Co <sub>0.2</sub> Mn <sub>0.2</sub> O <sub>2</sub> | 7.17     | 12.03    | 36.38    | 11.35    |
| (NCM622)                                                               |          |          |          |          |
| Commerce LiMn <sub>2</sub> O <sub>4</sub>                              | 3.83     |          |          | 60.77    |

**Tab. S2**  $I_{(003)}/I_{(104)}$  peak ratios of LiCoO<sub>2</sub> at different temperatures (XC-0.6N-2h-3H,

X = 190-230 °C).

| Temperature | 1    | 2    | 3 | 4   | 5 | 6    | 7 | 8   | 9 | 10  |
|-------------|------|------|---|-----|---|------|---|-----|---|-----|
| 190 °C      |      | 4.09 |   | 3.9 |   | 3.51 |   | 3.3 |   | 3.1 |
| 200 °C      |      | 3.1  |   | 2.2 |   |      |   |     |   |     |
| 210 °C      | 1.89 | 1.85 |   |     |   |      |   |     |   |     |
| 220 °C      | 2.26 | 1.88 |   |     |   |      |   |     |   |     |
| 230 °C      | 2.54 | 1.9  |   |     |   |      |   |     |   |     |

**Tab. S3** Detailed information of the added ammonium salts for treating different types of cathode materials (1 g of LiCoO<sub>2</sub>, NCM622, LiMn<sub>2</sub>O<sub>4</sub>).

| Ammonium salts                                                               | M (g/mol)               | LiCoO <sub>2</sub> | NCM622   | LiMn <sub>2</sub> O <sub>4</sub> |
|------------------------------------------------------------------------------|-------------------------|--------------------|----------|----------------------------------|
| NH <sub>4</sub> Cl                                                           | 53.49                   |                    | 0.6g     |                                  |
| (NH <sub>4</sub> ) <sub>2</sub> SO <sub>4</sub>                              | 132.14                  |                    | 0.7341   |                                  |
| (NH <sub>4</sub> ) <sub>2</sub> SO <sub>3</sub> ·H <sub>2</sub> O            | 134.14                  |                    | 0.745    |                                  |
| (NH <sub>4</sub> ) <sub>2</sub> CO <sub>3</sub>                              | 96.09                   |                    | 1.2338   |                                  |
| NH <sub>4</sub> HSO <sub>4</sub>                                             | 115.12                  |                    | 1.279    |                                  |
| NH <sub>4</sub> HCO <sub>3</sub>                                             | 79.05                   |                    | 0.8784   |                                  |
| (NH <sub>4</sub> ) <sub>3</sub> PO <sub>4</sub> ·3H <sub>2</sub> O           | 203.09                  |                    | 0.7341   |                                  |
| (NH <sub>4</sub> ) <sub>2</sub> HPO <sub>4</sub>                             | 132.06                  |                    | 0.7339   |                                  |
| NH <sub>4</sub> H <sub>2</sub> PO <sub>4</sub>                               | 115.03                  |                    | 1.2781   |                                  |
| NH <sub>4</sub> F                                                            | 37.0                    |                    | 0.4115   |                                  |
| NH <sub>4</sub> HCO <sub>2</sub>                                             | 63                      |                    | 0.7007   |                                  |
| NH <sub>4</sub> OAc                                                          | 77.08                   |                    | 0.8564   |                                  |
| C <sub>6</sub> H <sub>5</sub> O <sub>7</sub> (NH <sub>4</sub> ) <sub>3</sub> | 243.22                  |                    | 0.9008   |                                  |
| NH <sub>3</sub> ·H <sub>2</sub> O                                            | 0.91 g cm <sup>-3</sup> |                    | 1.556 mL |                                  |

**Tab. S4** The optimized reaction condition for treating different types of cathode materials with ammonium salts.

| Cathode material                      | Temperature<br>(°C) | Time (hour) | H <sub>2</sub> O (mL) |
|---------------------------------------|---------------------|-------------|-----------------------|
| LiCoO <sub>2</sub> (1g)               | 220 °C              | 4           | 3                     |
| NCM622 (1g)                           | 220 °C              | 4           | 3                     |
| LiMn <sub>2</sub> O <sub>4</sub> (1g) | 230 °C              | 4           | 3                     |

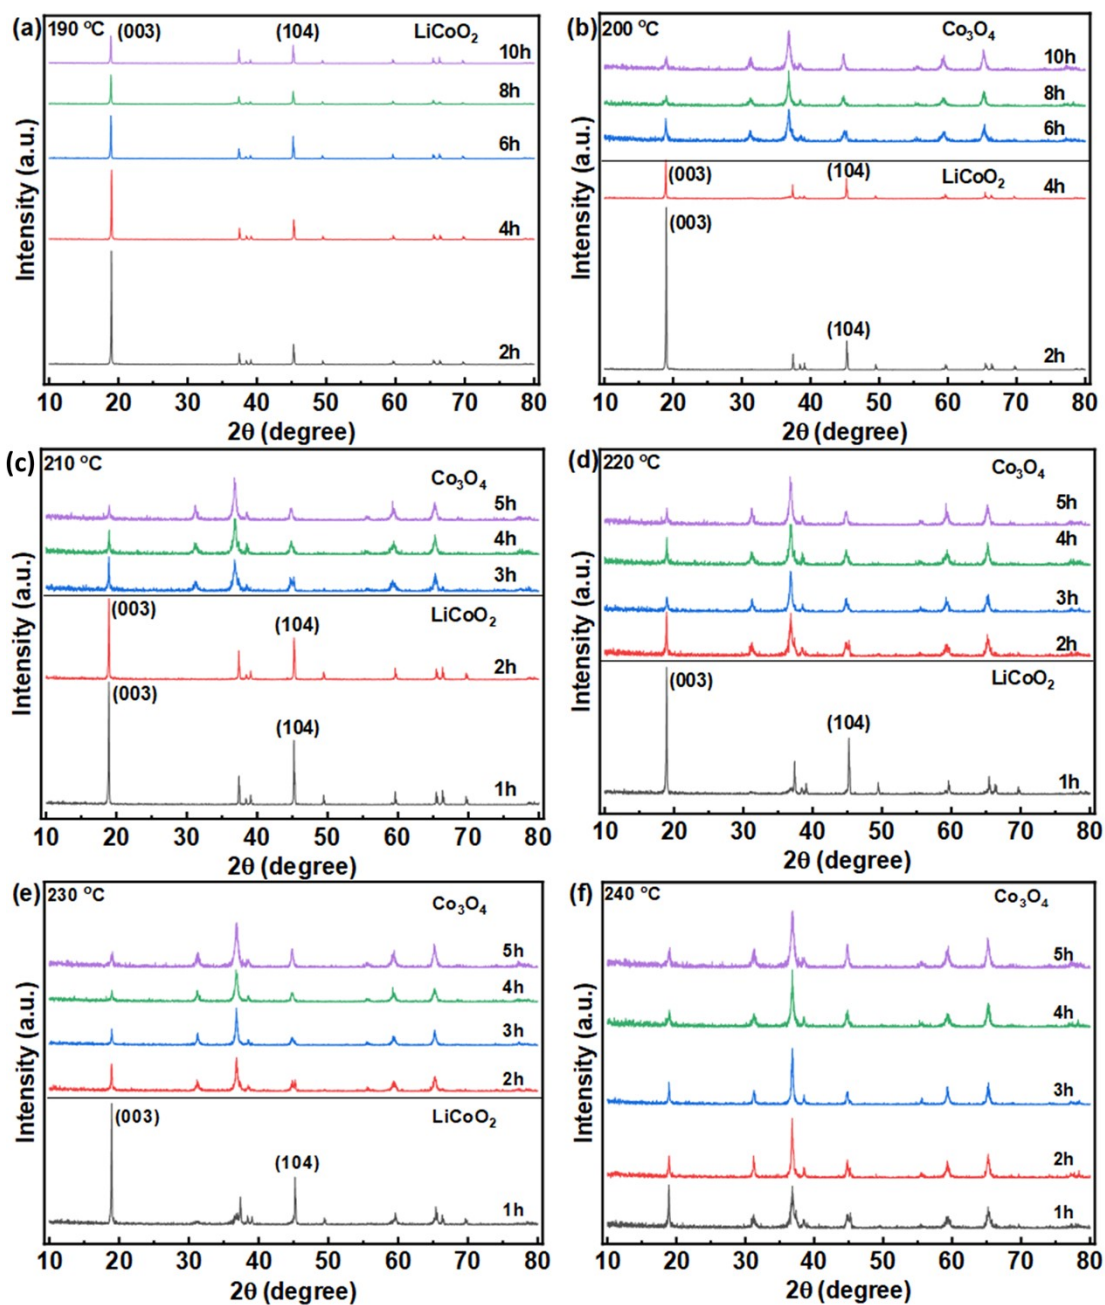

**Fig. S1** XRD patterns of the products after the reaction between 1 g of  $\text{LiCoO}_2$  and  $\text{NH}_4\text{Cl}$  at different times for (a) 190C-0.6N-Xh-3H, (b) 200C-0.6N-Xh-3H, (c) 210C-0.6N-Xh-3H, (d) 220C-0.6N-Xh-3H, (e) 230C-0.6N-Xh-3H, and (f) 240C-0.6N-Xh-3H (X refers different reaction time).

**The reaction equations of LiCoO<sub>2</sub> and different types of ammonium salts by vapor thermal reduction**

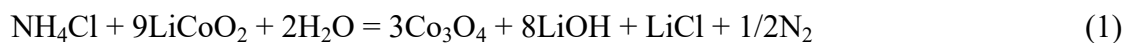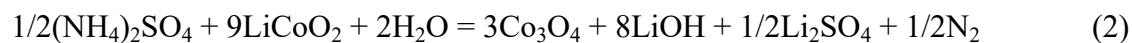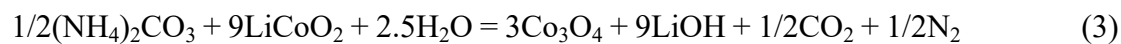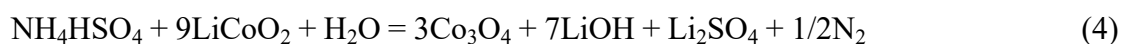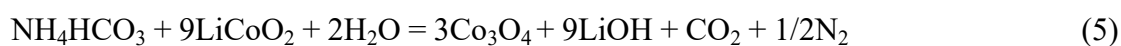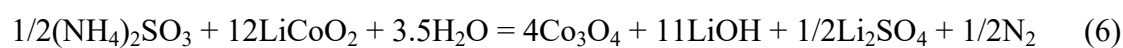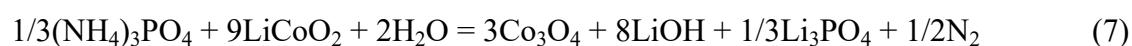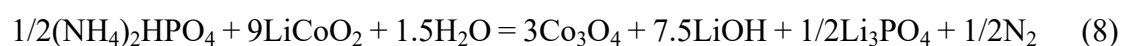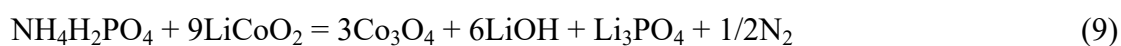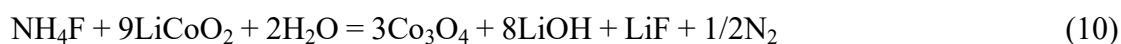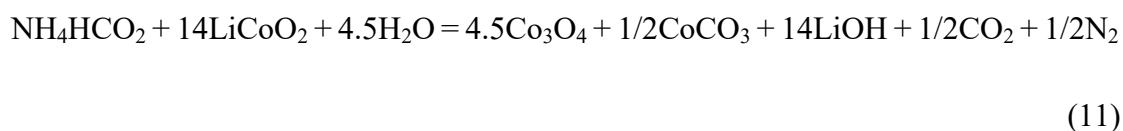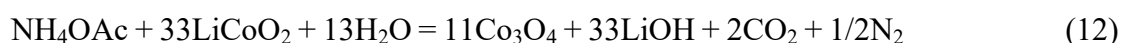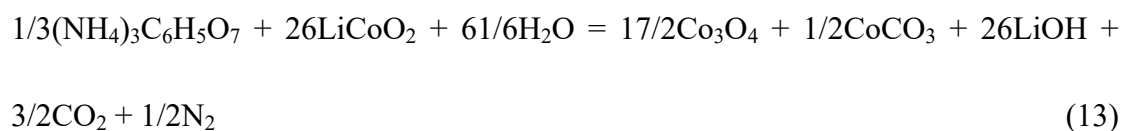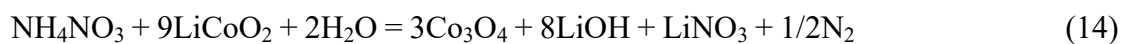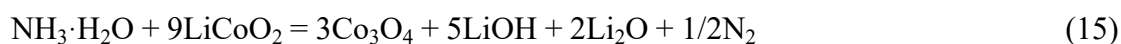

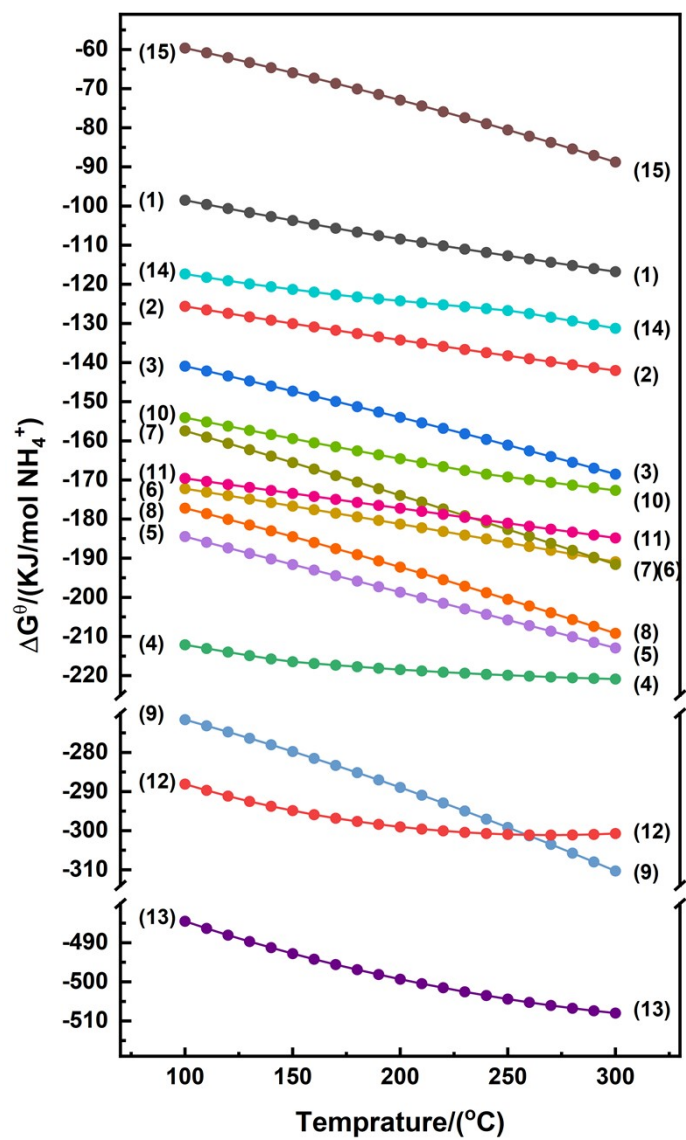

**Fig. S2** Profiles of Gibbs free energy as a function of temperature of typical reactions between  $\text{LiCoO}_2$  and different kinds of ammonium salts.

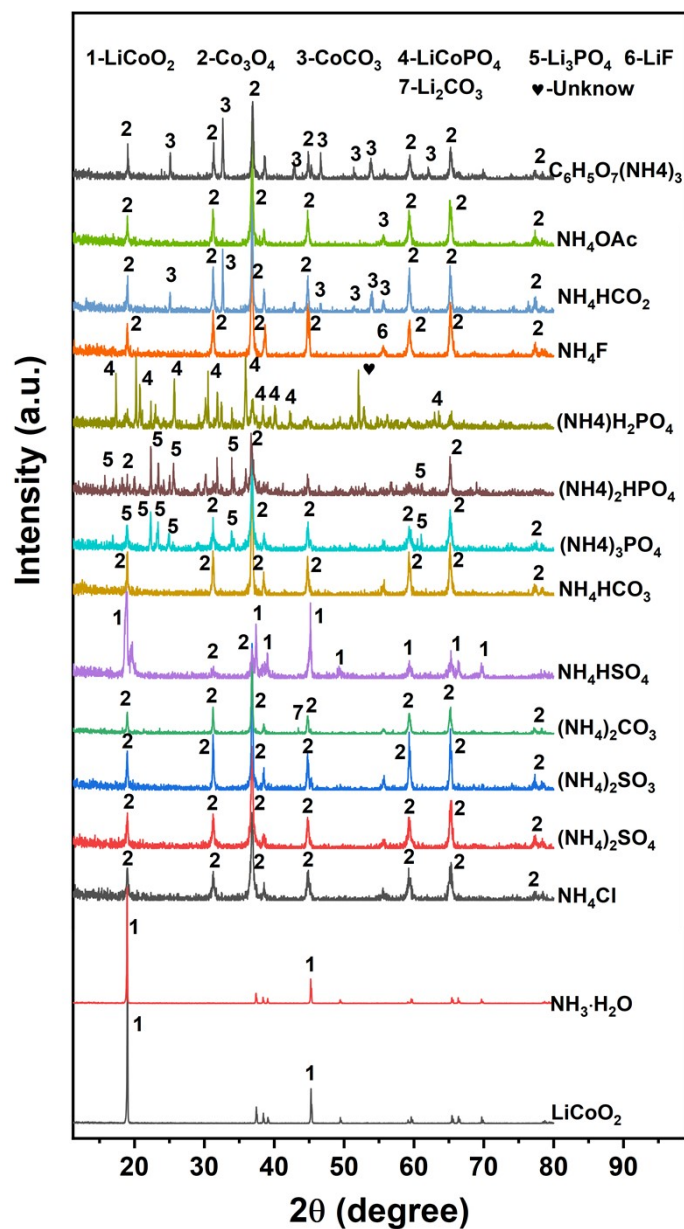

**Fig. S3** XRD patterns of pure  $\text{LiCoO}_2$ , and the products obtained from  $\text{LiCoO}_2$  and ammonium salts after vapor thermal reduction ( $220^\circ\text{C}$ -XN-4h-3H, X denotes different kinds of ammonium salts, the usage of ammonium salts was shown in **Tab. S3**)



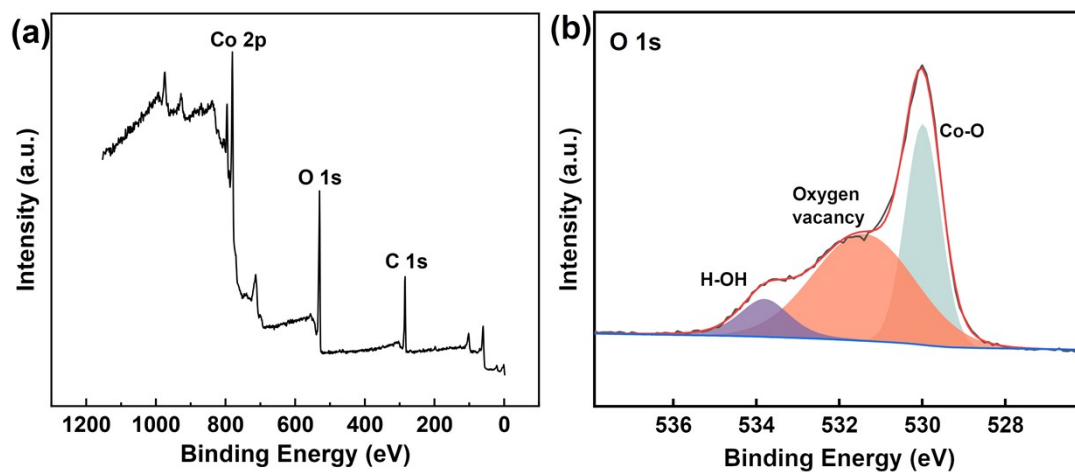

**Fig. S4** XPS spectra of the product obtained at 220C-0.6N-4h-3H (1g of  $\text{LiCoO}_2$ ) (a) a survey of the products, (b) O 1s.

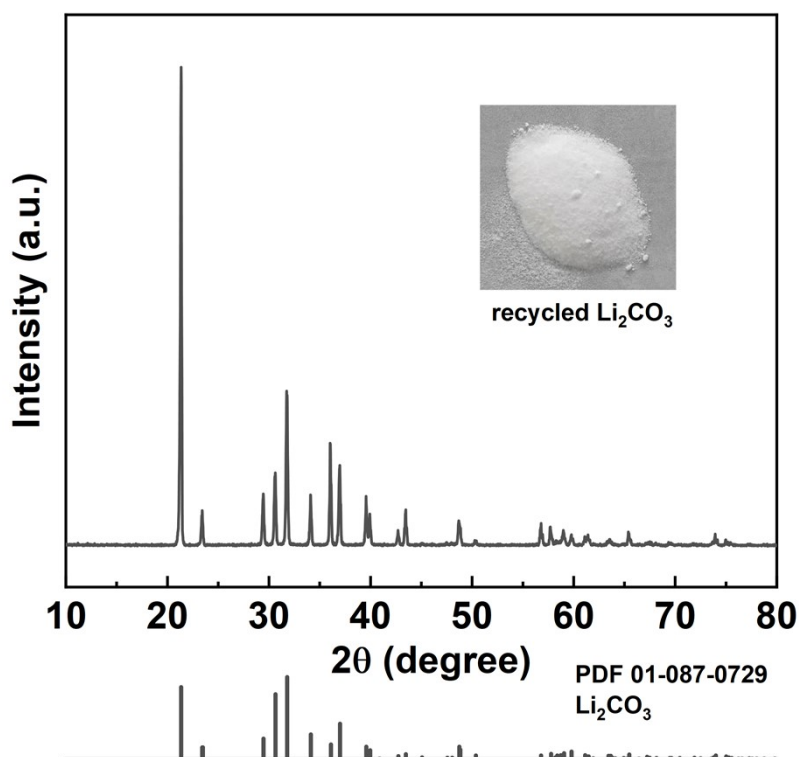

**Fig. S5** Pure  $\text{Li}_2\text{CO}_3$  obtained by adding 2 M  $\text{Na}_2\text{CO}_3$  solution into leachate ( $\text{LiCoO}_2$  treated by  $\text{NH}_4\text{Cl}$ , 220C-0.6N-4h-3H).

**Reaction equations of LiNi<sub>0.6</sub>Co<sub>0.2</sub>Mn<sub>0.2</sub>O<sub>2</sub> (NCM622) and ammonium salts by vapor thermal reduction.**

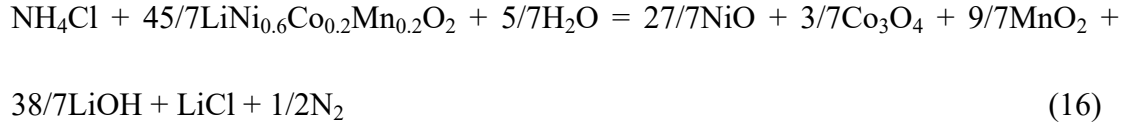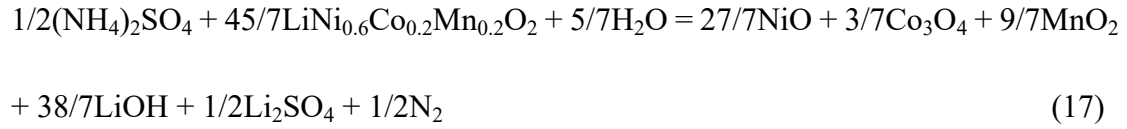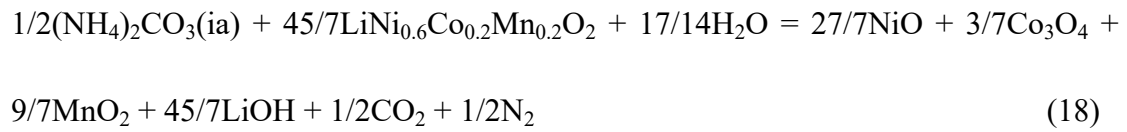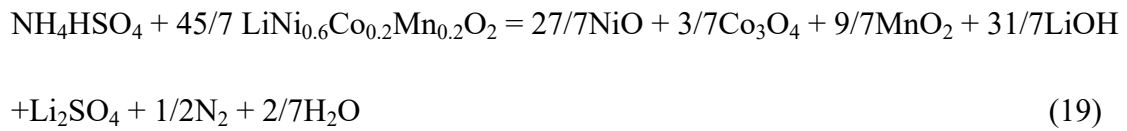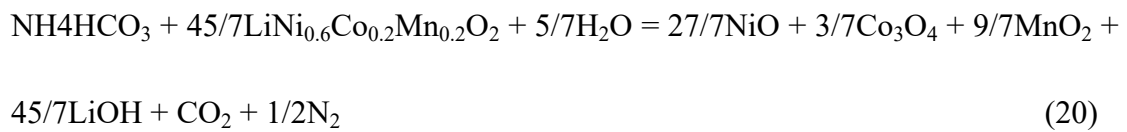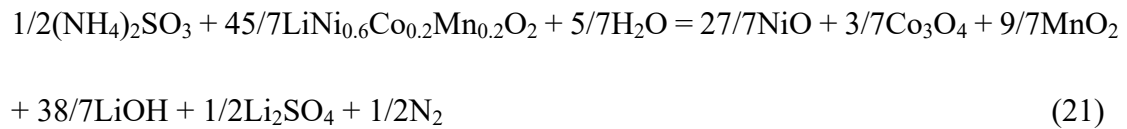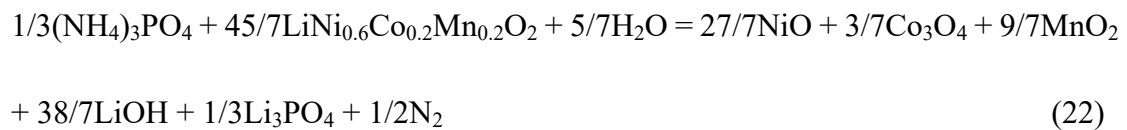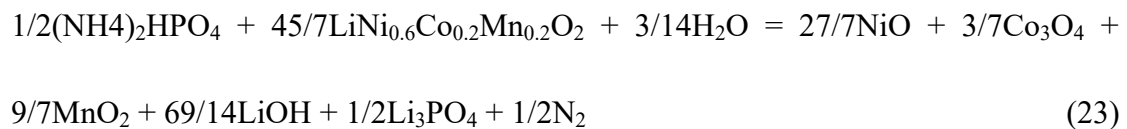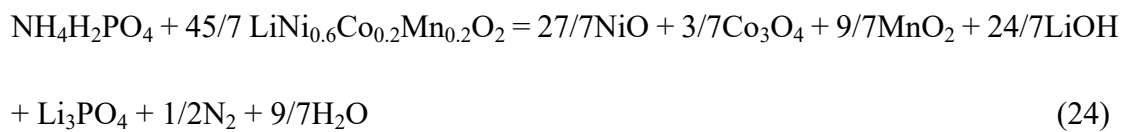

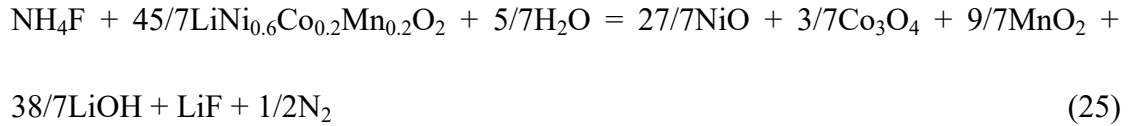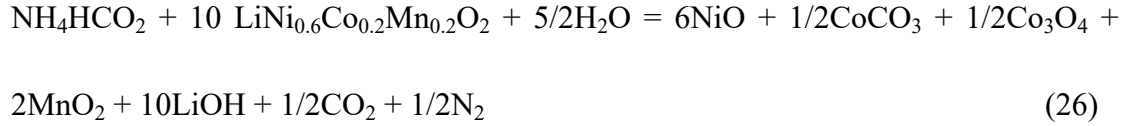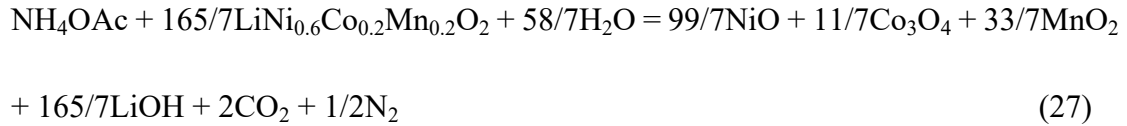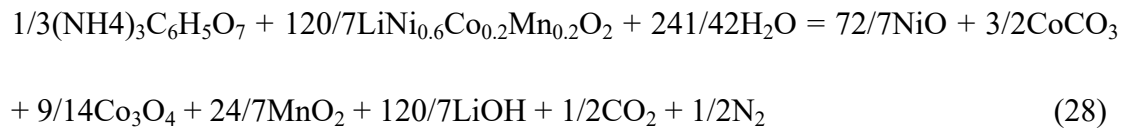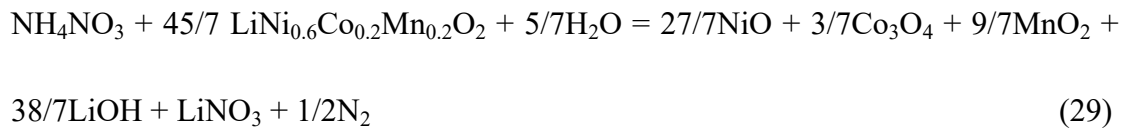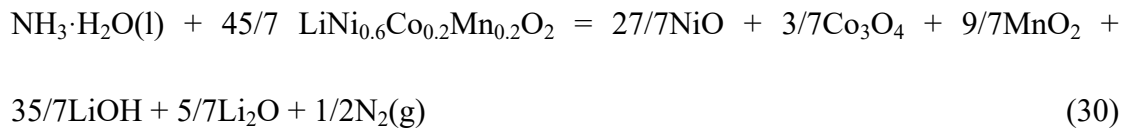

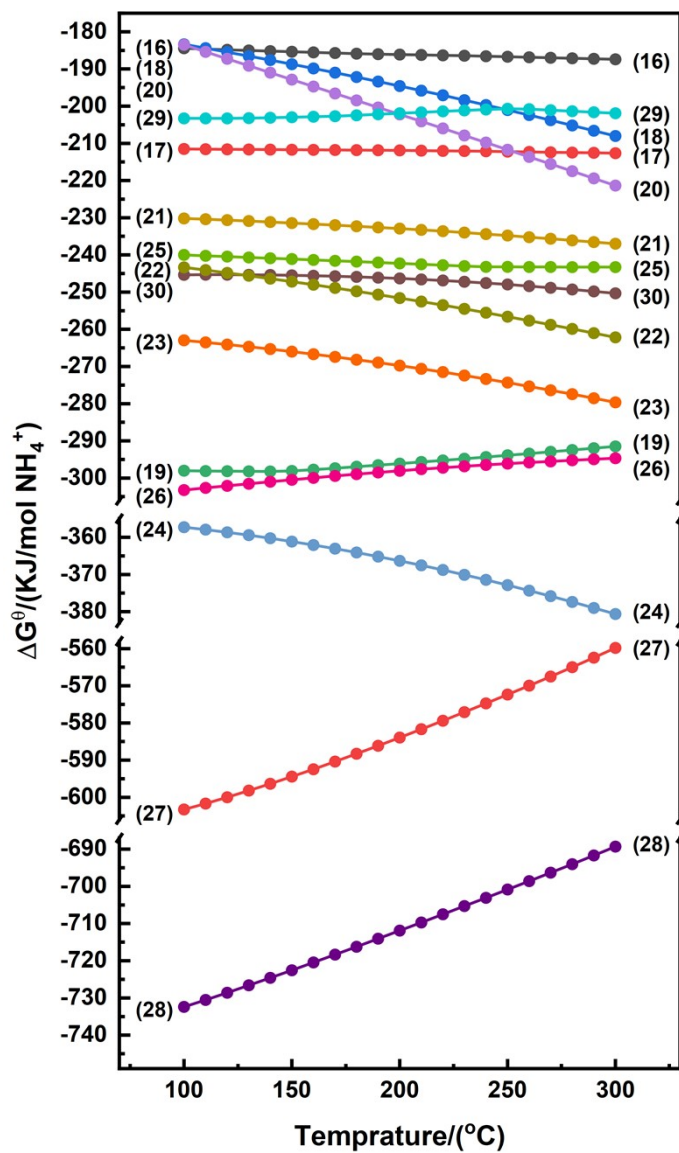

**Fig. S6** Profiles of Gibbs free energy as a function of temperature of the reactions between NCM622 and ammonium salts.

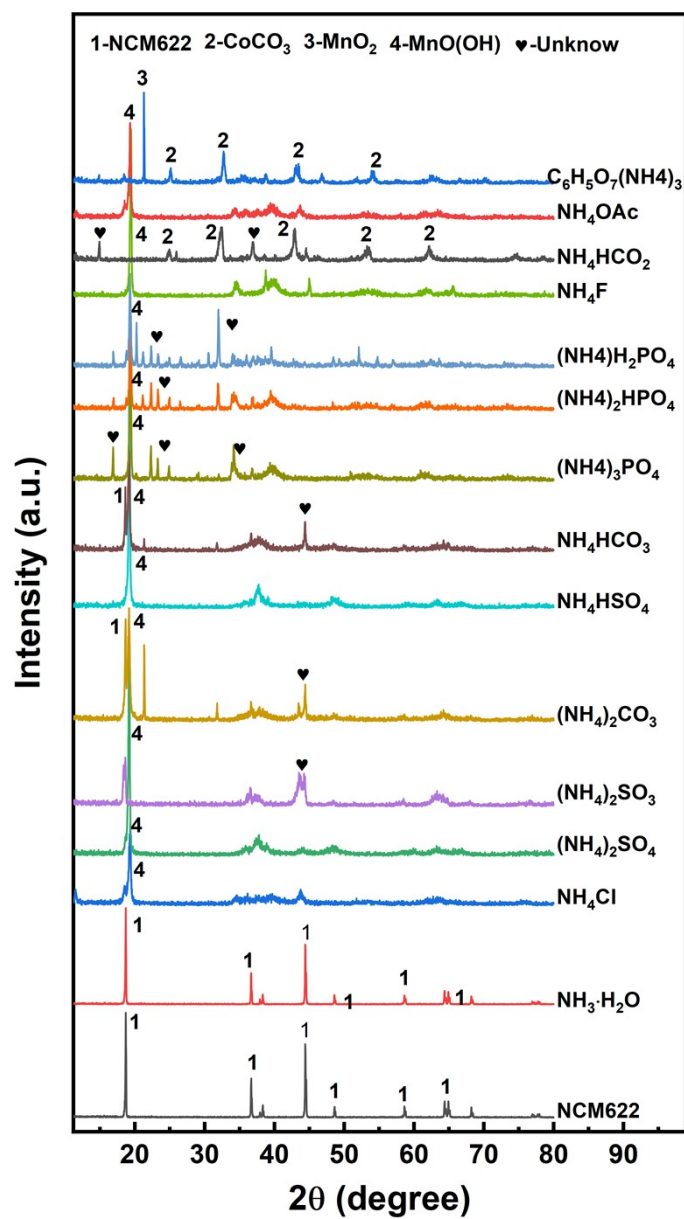

**Fig. S7** XRD patterns of pure NCM622 and the products obtained from NCM622 and ammonium salts after vapor thermal reduction (220C-XN-4h-3H, X denotes different kinds of ammonium salts, the usage of ammonium salts was shown in **Tab. S3**).

The NCM622 cathode has the same layered crystal structure with  $\text{LiCoO}_2$ , so the volume of water, reaction time, temperature, and the amount of ammonium salts were kept consistent with  $\text{LiCoO}_2$ . However,  $\text{LiMn}_2\text{O}_4$  has a spinel structure instead. In order to determine its optimum reaction temperature, the leaching experiment under different temperatures was designed (**Fig. S8**). The volume of water, reaction time, and the usage of ammonium salt were kept consistent with  $\text{LiCoO}_2$ . As shown in **Fig. S8**, the leaching efficiency of Li reached 99.8% at 230 °C, while the leaching rate of Mn was only 0.01%. Hence, the optimal reaction temperature for  $\text{LiMn}_2\text{O}_4$  was 230 °C. The usage of ammonium salts was listed in **Tab. S3**. The reaction equations of NCM622 and  $\text{LiMn}_2\text{O}_4$  are **equations 16-30** and **equations 31-45**, respectively. In addition, thermodynamic calculations are shown in **Fig. S6** and **Fig. S9**.

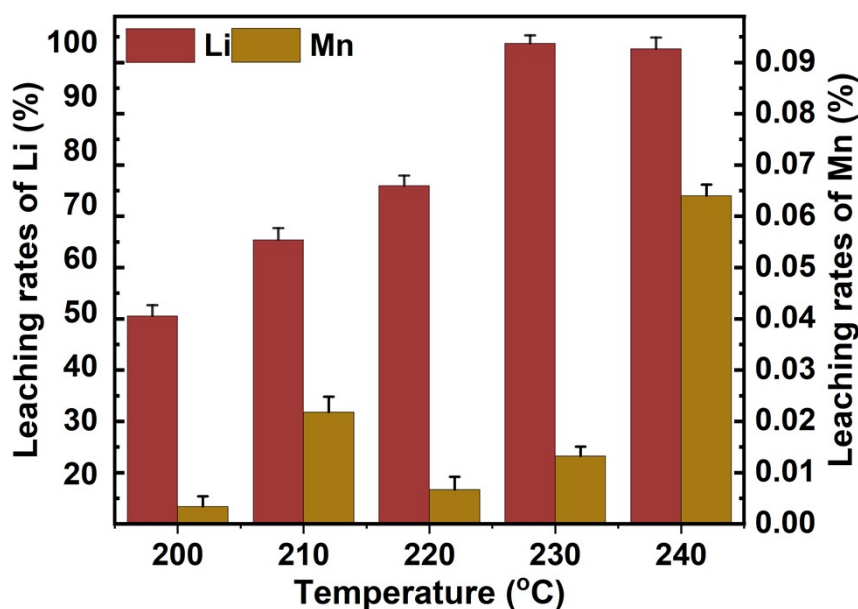

**Fig. S8** Leaching rates of Li and Mn of  $\text{LiMn}_2\text{O}_4$  under different temperatures (XC-0.73N-4h-3H, X = 200-240 °C).

**The reaction equations of  $\text{LiMn}_2\text{O}_4$  and ammonium salts by vapor thermal reduction.**

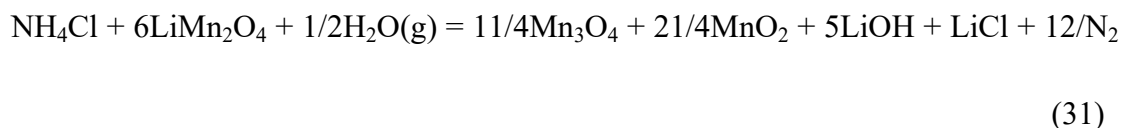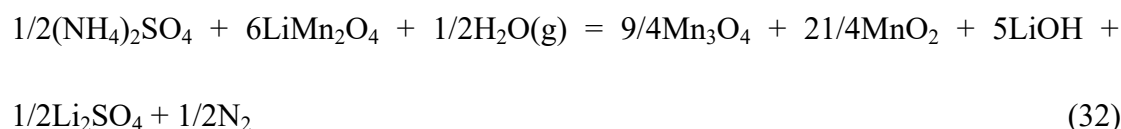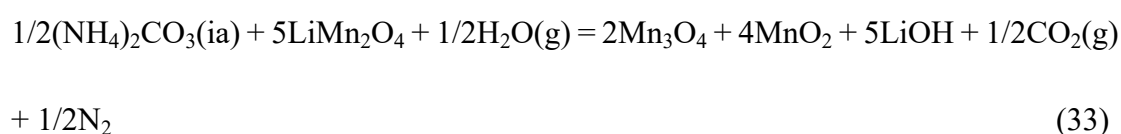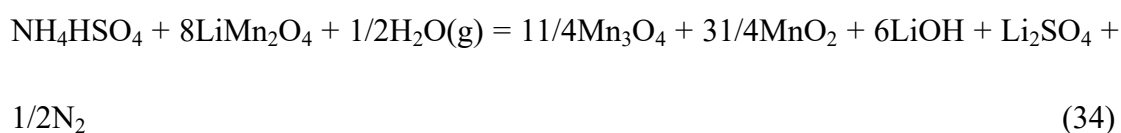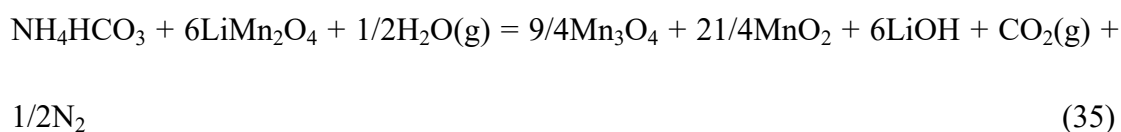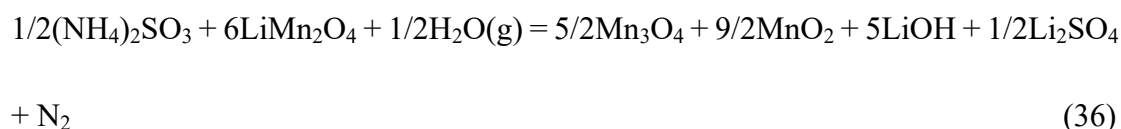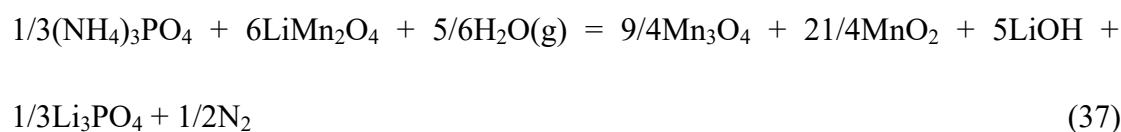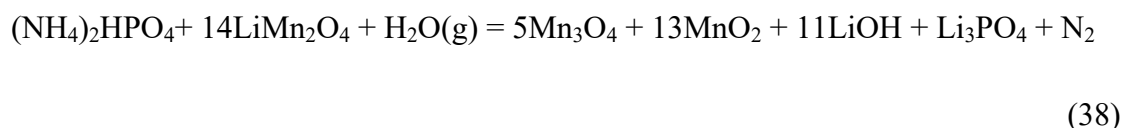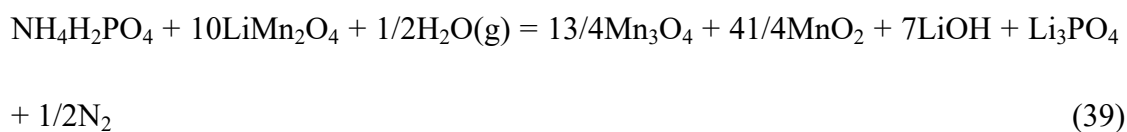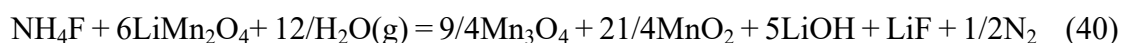

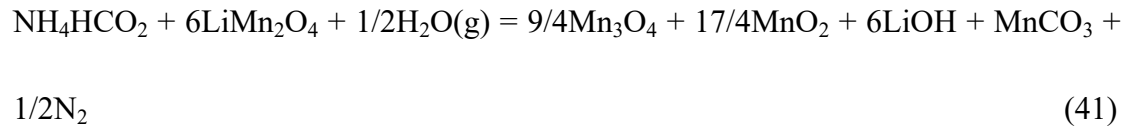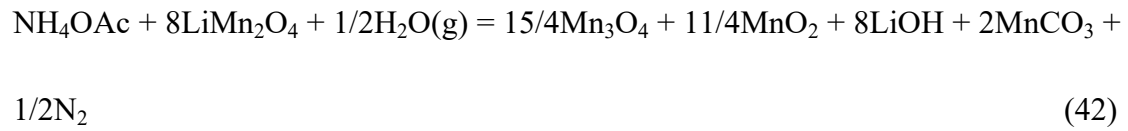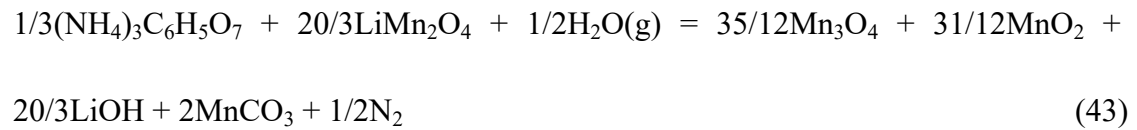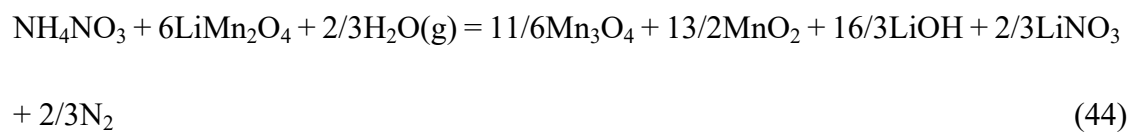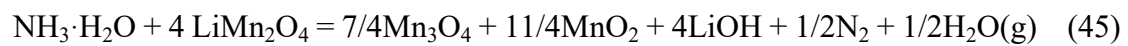



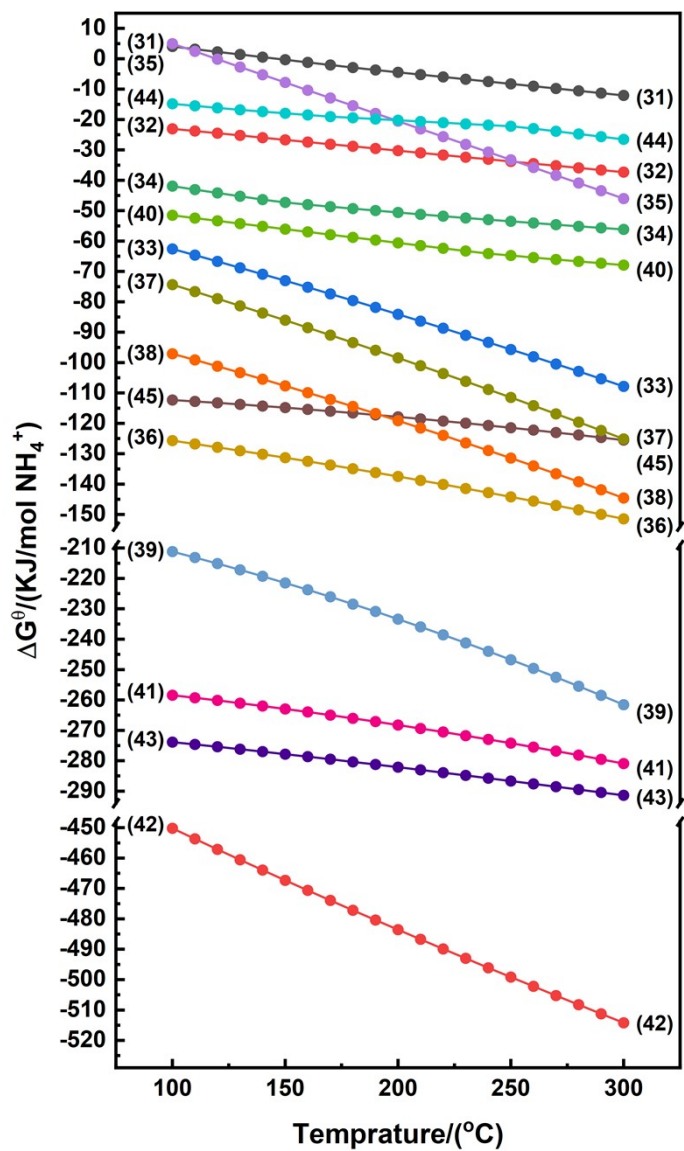

**Fig. S9** Profiles of Gibbs free energy as a function of temperature of the reactions between  $\text{LiMn}_2\text{O}_4$  and ammonium salts.

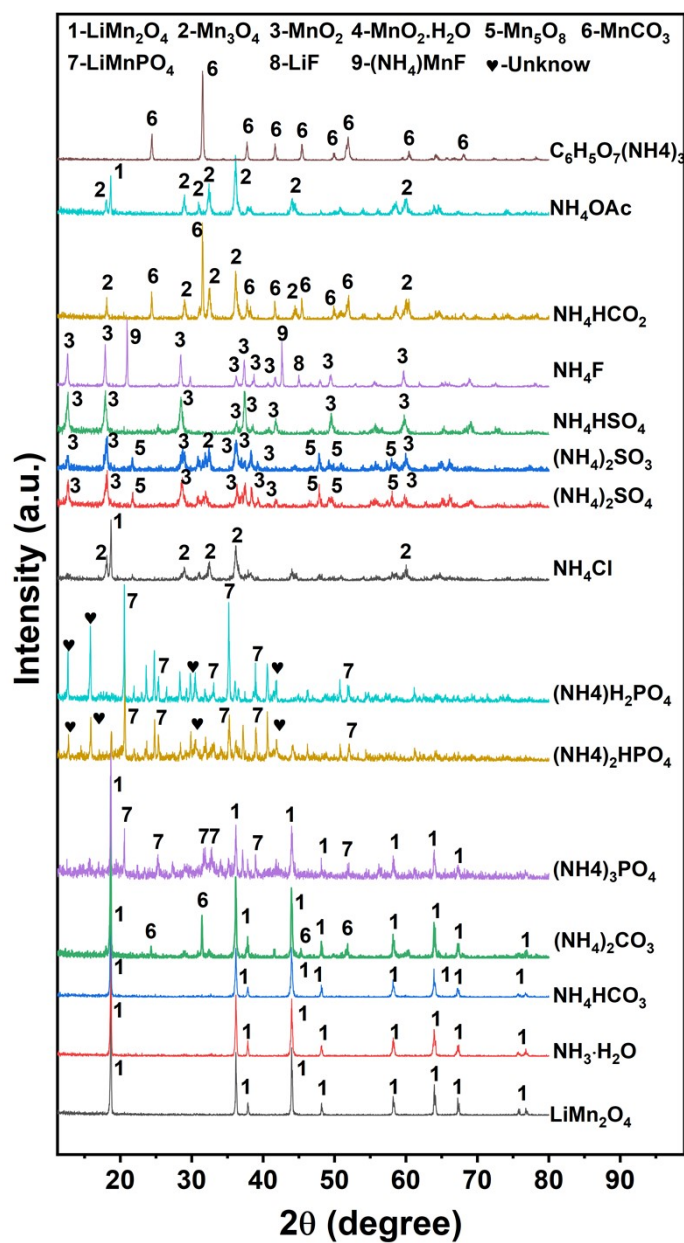

**Fig. S10** XRD patterns of pure  $\text{LiMn}_2\text{O}_4$ , and the products obtained from  $\text{LiMn}_2\text{O}_4$  and ammonium salts after vapor thermal reduction, (230C-XN-4h-3H, X denotes different kinds of ammonium salts, the usage of ammonium salts was shown in **Tab. S3**).

**Tab. S5** Leaching rates of Li, Ni, Co, and Mn for treat typical cathode materials (1 g of LiCoO<sub>2</sub>, NCM622, and LiMn<sub>2</sub>O<sub>4</sub>) using different types of ammonium salts.

| Ammonium Salt                                                      | LiCoO <sub>2</sub> |       | NCM622 |       |      |       | LiMn <sub>2</sub> O <sub>4</sub> |       |
|--------------------------------------------------------------------|--------------------|-------|--------|-------|------|-------|----------------------------------|-------|
|                                                                    | Li/                | Co/   | Li/    | Ni/   | Co/  | Mn/   | Li/                              | Mn/   |
|                                                                    | (%)                | (%)   | (%)    | (%)   | (%)  | (%)   | (%)                              | (%)   |
| NH <sub>4</sub> Cl                                                 | 98.7               | 0.021 | 89.01  | 6.16  | 0.41 | 0.041 | 89.2                             | 0.001 |
| (NH <sub>4</sub> ) <sub>2</sub> SO <sub>4</sub>                    | 90.74              | 0.053 | 99.17  | 0.24  | 0.03 | 0.001 | 99.8                             | 0.07  |
| (NH <sub>4</sub> ) <sub>2</sub> SO <sub>3</sub> ·H <sub>2</sub> O  | 99.78              | 0.038 | 98.98  | 0.04  | 0.02 | 0.02  | 99.7                             | 0.027 |
| (NH <sub>4</sub> ) <sub>2</sub> CO <sub>3</sub>                    | 37.3               | 0.107 | 50.69  | 0.07  | 0.05 | 0.001 | 50.65                            | 0.033 |
| NH <sub>4</sub> HSO <sub>4</sub>                                   | 61.69              | 20.13 | 99.71  | 16.85 | 1.66 | 0.008 | 99.6                             | 86.43 |
| NH <sub>4</sub> HCO <sub>3</sub>                                   | 47.45              | 0.122 | 58.13  | 0.07  | 0.05 | 0.001 | 0.02                             | 0.001 |
| (NH <sub>4</sub> ) <sub>3</sub> PO <sub>4</sub> ·3H <sub>2</sub> O | 1.58               | 0.046 | 1.49   | 0.43  | 0.18 | 0     | 4.87                             | 0.206 |
| (NH <sub>4</sub> ) <sub>2</sub> HPO <sub>4</sub>                   | 0.36               | 0.011 | 1.05   | 0.17  | 0.19 | 0     | 5.05                             | 0.066 |
| NH <sub>4</sub> H <sub>2</sub> PO <sub>4</sub>                     | 2.44               | 0.053 | 9.56   | 0.07  | 0.01 | 0.024 | 53.89                            | 0.183 |
| NH <sub>4</sub> F                                                  | 19.74              | 0.014 | 16.46  | 0.42  | 0.01 | 0     | 99.4                             | 20.67 |
| NH <sub>4</sub> HCO <sub>2</sub>                                   | 89.68              | 0.616 | 81.6   | 6.02  | 0.65 | 0.002 | 99.8                             | 0.005 |
| NH <sub>4</sub> OAc                                                | 98.49              | 0.077 | 93.19  | 2.13  | 0.67 | 0.003 | 93.94                            | 0.008 |

|                     |      |       |       |       |      |       |      |       |
|---------------------|------|-------|-------|-------|------|-------|------|-------|
| $C_6H_5O_7(NH_4)_3$ | 81.2 | 0.74  | 74.24 | 12.42 | 2.17 | 0.004 | 99.4 | 0.003 |
| $NH_3 \cdot H_2O$   | 0.96 | 0.004 | 2.16  | 0.001 | 0    | 0     | 13.7 | 0.094 |

---

**Tab. S6** Chemical components of products obtained from cathode materials (1 g of LiCoO<sub>2</sub>, NCM622, and LiMn<sub>2</sub>O<sub>4</sub>) which were treated with different types of ammonium salts.

| Ammonium salts                                                     | LiCoO <sub>2</sub>                                               | NCM622                                 | LiMn <sub>2</sub> O <sub>4</sub>                                    |
|--------------------------------------------------------------------|------------------------------------------------------------------|----------------------------------------|---------------------------------------------------------------------|
| NH <sub>4</sub> Cl                                                 | Co <sub>3</sub> O <sub>4</sub>                                   | MnO(OH), Unknow                        | LiMn <sub>2</sub> O <sub>4</sub> , Mn <sub>3</sub> O <sub>4</sub>   |
| (NH <sub>4</sub> ) <sub>2</sub> SO <sub>4</sub>                    | Co <sub>3</sub> O <sub>4</sub>                                   | MnO(OH), Unknow                        | MnO <sub>2</sub> , Mn <sub>5</sub> O <sub>8</sub>                   |
| (NH <sub>4</sub> ) <sub>2</sub> CO <sub>3</sub>                    | Co <sub>3</sub> O <sub>4</sub> , Li <sub>2</sub> CO <sub>3</sub> | MnO(OH), Unknow                        | LiMn <sub>2</sub> O <sub>4</sub> , MnCO <sub>3</sub>                |
| NH <sub>4</sub> HSO <sub>4</sub>                                   | LiCoO <sub>2</sub> , Co <sub>3</sub> O <sub>4</sub>              | MnO(OH), Unknow                        | MnO <sub>2</sub>                                                    |
| NH <sub>4</sub> HCO <sub>3</sub>                                   | Co <sub>3</sub> O <sub>4</sub>                                   | MnO(OH), Unknow                        | LiMn <sub>2</sub> O <sub>4</sub>                                    |
| (NH <sub>4</sub> ) <sub>2</sub> SO <sub>3</sub> ·H <sub>2</sub> O  | Co <sub>3</sub> O <sub>4</sub>                                   | MnO(OH), Unknow                        | MnO <sub>2</sub> , Mn <sub>5</sub> O <sub>8</sub>                   |
| (NH <sub>4</sub> ) <sub>3</sub> PO <sub>4</sub> ·3H <sub>2</sub> O | Co <sub>3</sub> O <sub>4</sub> , Li <sub>3</sub> PO <sub>4</sub> | MnO(OH), Unknow                        | LiMn <sub>2</sub> O <sub>4</sub> , LiMnPO <sub>4</sub>              |
| (NH <sub>4</sub> ) <sub>2</sub> HPO <sub>4</sub>                   | Co <sub>3</sub> O <sub>4</sub> , Li <sub>3</sub> PO <sub>4</sub> | MnO(OH), Unknow                        | LiMnPO <sub>4</sub>                                                 |
| NH <sub>4</sub> H <sub>2</sub> PO <sub>4</sub>                     | LiCoPO <sub>4</sub>                                              | MnO(OH), Unknow                        | LiMnPO <sub>4</sub>                                                 |
| NH <sub>4</sub> F                                                  | Co <sub>3</sub> O <sub>4</sub>                                   | MnO(OH), Unknow                        | MnO <sub>2</sub> , LiF,<br>(NH <sub>4</sub> )MnF                    |
| NH <sub>4</sub> HCO <sub>2</sub>                                   | Co <sub>3</sub> O <sub>4</sub> , CoCO <sub>3</sub>               | MnO(OH), CoCO <sub>3</sub> ,<br>Unknow | Mn <sub>3</sub> O <sub>4</sub> , MnCO <sub>3</sub>                  |
| NH <sub>4</sub> OAc                                                | Co <sub>3</sub> O <sub>4</sub>                                   | MnO(OH), Unknow                        | LiMn <sub>2</sub> O <sub>4</sub> , Mn <sub>3</sub> O <sub>4</sub> , |

|                                                                              |                                                    |                                      |                                  |
|------------------------------------------------------------------------------|----------------------------------------------------|--------------------------------------|----------------------------------|
|                                                                              |                                                    |                                      | MnO <sub>2</sub>                 |
| C <sub>6</sub> H <sub>5</sub> O <sub>7</sub> (NH <sub>4</sub> ) <sub>3</sub> | Co <sub>3</sub> O <sub>4</sub> , CoCO <sub>3</sub> | MnO <sub>2</sub> , CoCO <sub>3</sub> | MnCO <sub>3</sub>                |
| NH <sub>3</sub> ·H <sub>2</sub> O                                            | LiCoO <sub>2</sub>                                 | NCM622                               | LiMn <sub>2</sub> O <sub>4</sub> |

---

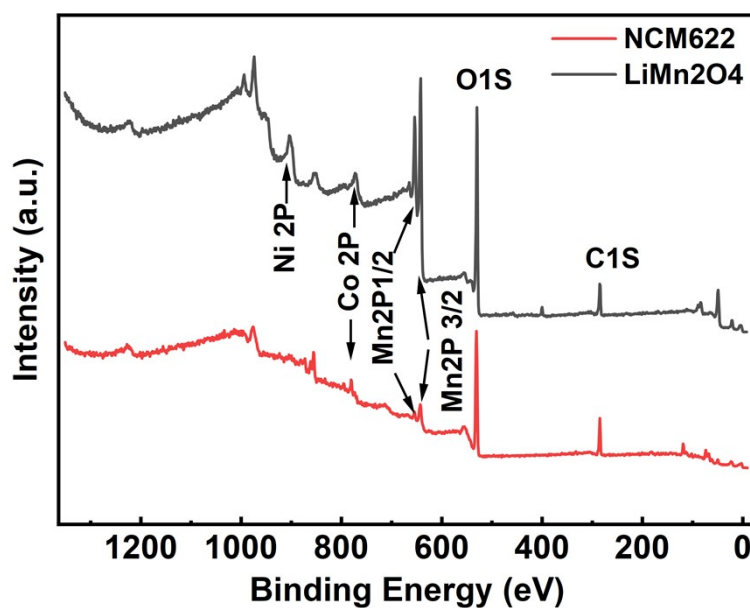

**Fig. S11** XPS spectra of the products obtained from NCM622 and LiMn<sub>2</sub>O<sub>4</sub> treated by (NH<sub>4</sub>)<sub>2</sub>SO<sub>4</sub> (reaction condition: 220C-0.73N-4h-3H for NCM622, 230C-0.73N-4h-3H for LiMn<sub>2</sub>O<sub>4</sub>).

**The reaction equations of ammonium salt roasting for LMTO cathode materials**

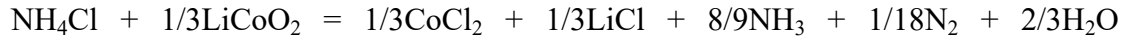

(46)

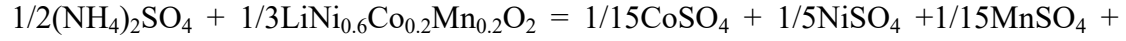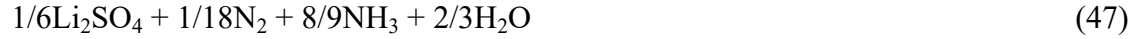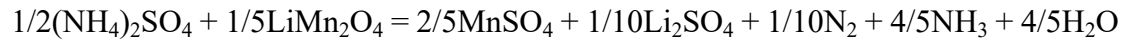

(48)

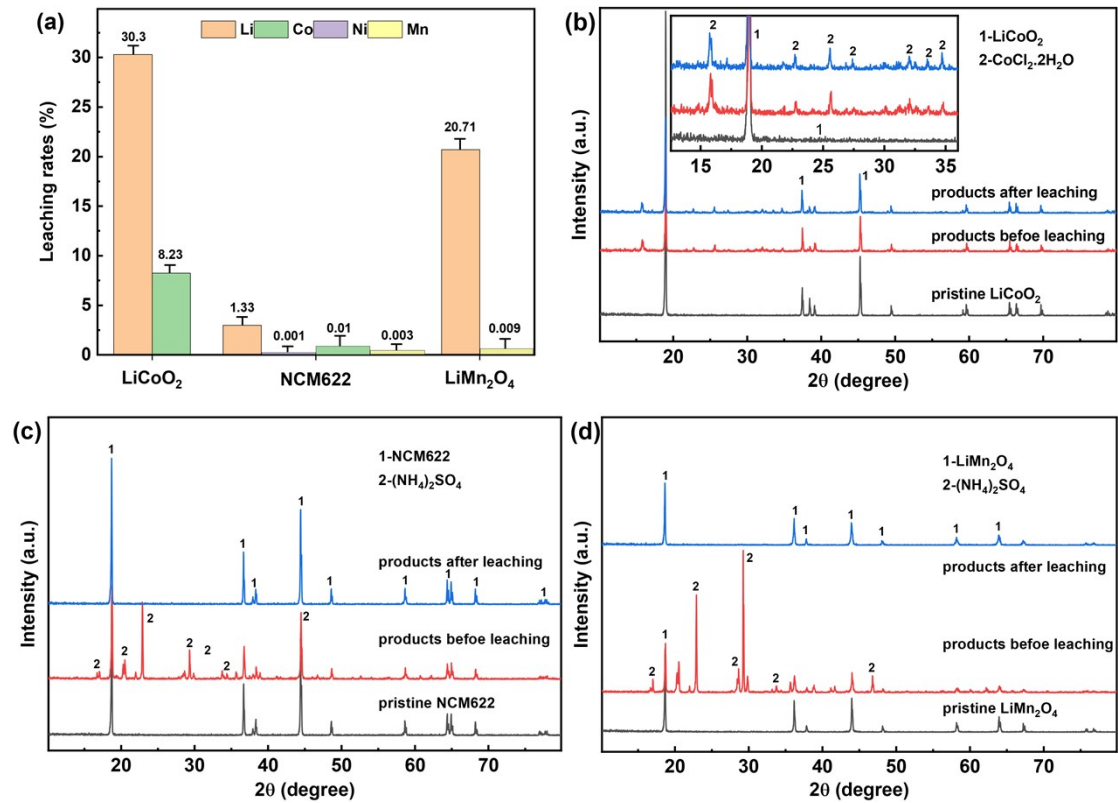

**Fig. S12** (a) Leaching rates of Li, Ni, Co, and Mn of different types of cathode materials treated by ammonium salts in a hydrothermal reactor without adding H<sub>2</sub>O (reaction condition: 220C-0.6N-4h-0H for LiCoO<sub>2</sub>/NH<sub>4</sub>Cl, 220C-0.73N-4h-0H for NCM622/(NH<sub>4</sub>)<sub>2</sub>SO<sub>4</sub>, and 230C-0.73N-4h-0H for LiMn<sub>2</sub>O<sub>4</sub>/(NH<sub>4</sub>)<sub>2</sub>SO<sub>4</sub>). (b-d) XRD patterns of the products of the cathode materials treated by ammonium salts without

water in a hydrothermal reactor obtained from (a): (b)  $\text{LiCoO}_2 + \text{NH}_4\text{Cl}$ , (c)  $\text{NCM622} + (\text{NH}_4)_2\text{SO}_4$ , (d)  $\text{LiMn}_2\text{O}_4 + (\text{NH}_4)_2\text{SO}_4$ .

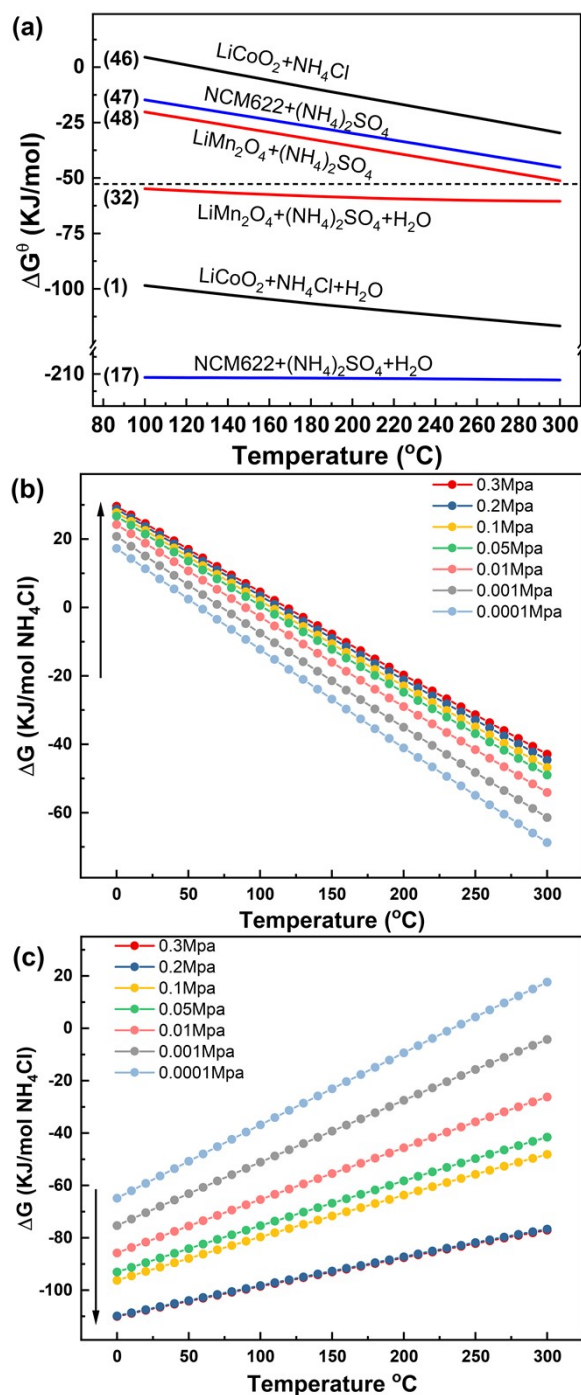

**Fig. S13** (a) Profiles of Gibbs free energies as a function of temperature of ammonium roasting and ammonium reduction in a hydrothermal reactor by vapor thermal



reduction. **Eqs.** 1, 17, and 32 correspond to the vapor thermal recovery for LMTO cathode, and **Eqs.** 46, 47, and 48 correspond to the ammonium salt roasting for LMTO cathode without the participation of H<sub>2</sub>O. The effect of partial pressure of H<sub>2</sub>O vapor inside the reactor on the thermal reduction of (b) LiCoO<sub>2</sub>-NH<sub>4</sub>Cl, **Eq.** 46, and (c) NH<sub>4</sub>Cl +LiCoO<sub>2</sub> +H<sub>2</sub>O, **Eq.** 1.

**Tab. S7** Summary of the reaction conditions between ammonium salt roasting and leaching (the usage of chemicals and H<sub>2</sub>O are calculated based on 1 g of LMTO cathode material).

| Reaction system                                         | Temp<br>e<br>-rature<br>(°C) | Usage of<br>reagent<br>(g) | Usage<br>of H <sub>2</sub> O<br>(mL) | Reaction<br>time<br>(minute) | Products                                                                                                                                           | Ref |
|---------------------------------------------------------|------------------------------|----------------------------|--------------------------------------|------------------------------|----------------------------------------------------------------------------------------------------------------------------------------------------|-----|
| NH <sub>4</sub> Cl-LCO                                  | 350                          | 2.0g                       |                                      | 20                           | NH <sub>4</sub> CoCl <sub>3</sub> , Li <sub>2</sub> CoCl <sub>4</sub>                                                                              | 1   |
| NH <sub>4</sub> Cl-LCO                                  | 300                          | 2.0g                       |                                      | 20                           | NH <sub>4</sub> CoCl <sub>3</sub> , Li <sub>2</sub> CoCl <sub>4</sub>                                                                              | 2   |
| (NH <sub>4</sub> ) <sub>2</sub> SO <sub>4</sub> -LCO    | 400                          | 4.0g                       |                                      | 120                          | Li <sub>2</sub> Co(SO <sub>4</sub> ) <sub>2</sub> , LiSO <sub>4</sub>                                                                              | 3   |
| (NH <sub>4</sub> ) <sub>2</sub> SO <sub>4</sub> -NCM622 | 400                          | 4.0                        |                                      | 90                           | Li <sub>2</sub> Co(SO <sub>4</sub> ) <sub>2</sub> , MnSO <sub>4</sub><br>NiSO <sub>4</sub>                                                         | 4   |
| (NH <sub>4</sub> ) <sub>2</sub> SO <sub>4</sub> -LCO    | 600                          | 3.0                        |                                      | 45                           | Li <sub>2</sub> Co(SO <sub>4</sub> ) <sub>2</sub> , CoSO <sub>4</sub>                                                                              | 5   |
| (NH <sub>4</sub> ) <sub>2</sub> SO <sub>4</sub> -LMO    | 600                          | 1.53                       |                                      | 45                           | Li <sub>2</sub> Mn <sub>2</sub> (SO <sub>4</sub> ) <sub>3</sub> , MnSO <sub>4</sub>                                                                | 6,7 |
| NH <sub>4</sub> Cl-LCO                                  | 400                          | 2.0                        |                                      | 20                           | NH <sub>4</sub> CoCl <sub>3</sub> , CoCl <sub>2</sub> , LiCl                                                                                       | 8,9 |
| NH <sub>4</sub> Cl-LMTO                                 | 550                          | 1.9                        |                                      | 30                           | Mn <sub>3</sub> O <sub>4</sub> , LiCl                                                                                                              | 10  |
| (NH <sub>4</sub> ) <sub>2</sub> SO <sub>4</sub> -NCM    | 650                          | 2.96                       |                                      | 150                          | NiO, Co <sub>3</sub> O <sub>4</sub> , MnSO <sub>4</sub> ,<br>Li <sub>2</sub> SO <sub>4</sub> , Li <sub>2</sub> Co(SO <sub>4</sub> ) <sub>2</sub> , | 11  |
| 3M (NH <sub>4</sub> ) <sub>2</sub> SO <sub>4</sub> ,    |                              |                            |                                      |                              | MnSO <sub>4</sub> , CoSO <sub>4</sub> ,                                                                                                            |     |
| 0.75M (NH <sub>4</sub> ) <sub>2</sub> SO <sub>3</sub> , | 180                          | 5.82                       | 12.05                                | 120                          | (NH <sub>4</sub> ) <sub>2</sub> Mn(SO <sub>4</sub> ) <sub>2</sub> ·6H <sub>2</sub> O                                                               | 12  |
| 83 g L <sup>-1</sup> LCO + LMO                          |                              |                            |                                      |                              |                                                                                                                                                    |     |

|                                                            |     |       |      |     |                                                                                                         |    |
|------------------------------------------------------------|-----|-------|------|-----|---------------------------------------------------------------------------------------------------------|----|
| 367.5 g L <sup>-1</sup> NH <sub>3</sub> ·H <sub>2</sub> O, |     |       |      |     |                                                                                                         |    |
| 140 g L <sup>-1</sup> NH <sub>4</sub> HCO <sub>3</sub> ,   |     |       |      |     | NiSO <sub>4</sub> , CoSO <sub>4</sub> ,                                                                 | 13 |
| 63.24 g L <sup>-1</sup> H <sub>2</sub> O <sub>2</sub>      | 30  | 38.05 | 66.7 |     | MnCO <sub>3</sub> , Li <sub>2</sub> CO <sub>3</sub>                                                     |    |
| 15 g L <sup>-1</sup> NCM523                                |     |       |      |     |                                                                                                         |    |
| 1 M NH <sub>3</sub> ·H <sub>2</sub> O,                     |     |       |      |     |                                                                                                         |    |
| 0.5 M (NH <sub>4</sub> ) <sub>2</sub> SO <sub>3</sub> ,    |     |       |      |     | NiSO <sub>4</sub> , CoSO <sub>4</sub> ,                                                                 | 14 |
| 1 M (NH <sub>4</sub> ) <sub>2</sub> CO <sub>3</sub> ,      | 80  | 18.9  | 100  | 60  | MnO <sub>2</sub> , Mn <sub>3</sub> O <sub>4</sub> , MnCO <sub>3</sub> , Li <sub>2</sub> CO <sub>3</sub> |    |
| 10 g L <sup>-1</sup> NCM + LMO                             |     |       |      |     |                                                                                                         |    |
| 4M NH <sub>3</sub> ·H <sub>2</sub> O,                      |     |       |      |     | NiSO <sub>4</sub> , CoSO <sub>4</sub> ,                                                                 |    |
| 1.5 NH <sub>4</sub> Cl,                                    |     |       |      |     | MnSO <sub>4</sub> , Mn <sub>3</sub> O <sub>4</sub> ,                                                    | 15 |
| 0.5 M Na <sub>2</sub> SO <sub>3</sub> ,                    | 80  | 28.31 | 100  | 300 | (NH <sub>4</sub> ) <sub>2</sub> Mn(SO <sub>3</sub> ) <sub>2</sub> ·2H <sub>2</sub> O                    |    |
| 10 g·L <sup>-1</sup> NCM                                   |     |       |      |     |                                                                                                         |    |
| 1.5 M NH <sub>3</sub> ·H <sub>2</sub> O,                   |     |       |      |     | NiSO <sub>4</sub> , CoSO <sub>4</sub> ,                                                                 |    |
| 1 M (NH <sub>4</sub> ) <sub>2</sub> SO <sub>3</sub> ,      |     |       |      |     | MnSO <sub>4</sub> , Li <sub>2</sub> SO <sub>4</sub> ,                                                   | 16 |
| 1 M NH <sub>4</sub> HCO <sub>3</sub> ,                     | 60  | 12.32 | 50   | 180 | (NH <sub>4</sub> ) <sub>2</sub> Mn(SO <sub>3</sub> ) <sub>2</sub> ·2H <sub>2</sub> O                    |    |
| 20 g L <sup>-1</sup> LCNO                                  |     |       |      |     |                                                                                                         |    |
| 4 M NH <sub>3</sub> ·H <sub>2</sub> O,                     |     |       |      |     | NiSO <sub>4</sub> , CoSO <sub>4</sub> ,                                                                 |    |
| 1.5 M NH <sub>4</sub> Cl,                                  |     |       |      |     | MnSO <sub>4</sub> , Li <sub>2</sub> SO <sub>4</sub> ,                                                   | 17 |
| 0.5M Na <sub>2</sub> SO <sub>3</sub> ,                     | 80  | 40.1  | 100  | 600 | (NH <sub>4</sub> ) <sub>2</sub> Mn(SO <sub>3</sub> ) <sub>2</sub> ·2H <sub>2</sub> O                    |    |
| 10 g L <sup>-1</sup> NCM                                   |     |       |      |     |                                                                                                         |    |
| 6 M NH <sub>3</sub> ·H <sub>2</sub> O,                     | 150 | 33.9  | 100  | 30  | NiSO <sub>4</sub> , CoSO <sub>4</sub> ,                                                                 | 18 |

0.5 M NH<sub>4</sub>Cl,

MnSO<sub>4</sub>, Li<sub>2</sub>SO<sub>4</sub>,

0.5 M Na<sub>2</sub>SO<sub>3</sub>,

(NH<sub>4</sub>)<sub>2</sub>Mn(SO<sub>3</sub>)<sub>2</sub>·2H<sub>2</sub>O

10 g L<sup>-1</sup> LTMO

---

M: mol/L

### **Economic and technic feasibility:**

A detailed discussion about the economic and technic feasibility of recycling processes was below which has been added into Supporting information and highlighted.

Here, vapor thermal method was used to simulate recycling spent LiCoO<sub>2</sub> battery by a pilot batch process. Economic and energy consumption prospective of the vapor thermal approach was detailed discussed.

The recycling process in this study can be divided into four parts as shown in **Fig. S14**: NaCl-Discharging and Dismantling; Vapor thermal; Filtration ; Precipitation. It was assumed that 1 ton of spent LiCoO<sub>2</sub> batteries were treated by our green recycling process in China, the exchange rate between RMB and USD is 6.5(1\$=6.5 CNY). The assumption of the cost of labor: the working day is 300 days per year (average 21 days per month) and the working time is about 8 hours every day. The average wage of per labor is 6200 CNY per year (\$32 per day) in china. The assumption of the costs of electricity charge and other industrial raw material price are listed in **Tab. S8** (<https://tradingeconomics.com/>):

**Tab. S8** The assumption of the costs of electricity charge and other industrial raw

| material price                   |            |
|----------------------------------|------------|
| Material                         | Price (\$) |
| Spent LiCoO <sub>2</sub> battery | 300/t      |
| Water                            | 0.92/t     |
| NaCl                             | 84.6/t     |
| NH <sub>4</sub> Cl               | 144/t      |
| Na <sub>2</sub> CO <sub>3</sub>  | 265/t      |
| Electricity                      | 0.2/kWh    |
| Li <sub>2</sub> CO <sub>3</sub>  | 15384/t    |
| Co <sub>3</sub> O <sub>4</sub>   | 46152/t    |
| Al                               | 3076/t     |
| Labor wage                       | 32/day     |

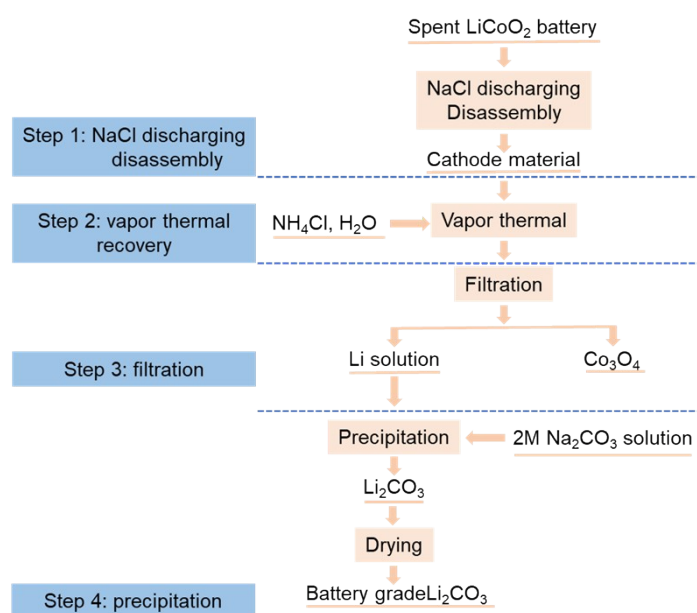

**Fig. S14** A proposed vapor thermal process for the recycling of valuable metals from the spent LiCoO<sub>2</sub> Battery

And the energy consumption, the cost of energy, other industrial raw material, and labor are calculated as **Equations. (49-51)**:

$$C_e = P \times t \times c_e \quad (49)$$

$$C_m = m \times c_m \quad (50)$$

$$C_l = n \times c_l \quad (51)$$

$C_e$ ,  $C_w$ ,  $C_l$  are the cost of electricity, industrial raw material, labor, respectively.  $P$ ,  $m$ ,  $n$  are the equipment power (kW), the consumption of industrial raw material (t), and the number of workers.  $t$  is the working time of equipment.  $c_e$ ,  $c_w$ ,  $c_l$  is the electricity price, the price of industrial raw material, and wage of per labor. Finally, the energy consumption and the cost of every process and revenue of products in this study were calculated in detailed and then a profit was obtained by recycling 1 ton spent LiCoO<sub>2</sub> batteries with the current process as follows in China.

### **Step 1: NaCl-discharging and dismantling:**

**NaCl-discharging requirement:** discharging in 5wt.% NaCl solution for 12 h, batteries/solution = 1:10 w/w (assume that the discharging is done at the night before); about 0.5 ton of NaCl and 2 ton of water were needed in the discharging process; one person, a set of automatic conveyor belts ( $P = 5\text{kW}$ ,  $2.0\text{ m/s}$ , maximum capacity= $1000\text{ m}^3/\text{h}$ ) work for 8 hour every day.

$$C_e = P \times t \times c_e = 5\text{kW h}^{-1} \times 8\text{h} \times \$0.2 = \$8$$

$$C_{\text{water}} = m \times c_{\text{water}} = 2 \times 0.92\$ = 1.84\$$$

$$C_{NaCl} = m \times c_{NaCl} = 0.5 \times 84.6\$ = 42.3\$$$

$$C_l = n \times c_l = 1 \times \$32 = \$32$$

**Dismantling:** A small automated dismantling device was designed for spent LiCoO<sub>2</sub> batteries (P=8kW, maximum capacity=100kg/h, work time=10h)

$$C_e = P \times t \times c_e = 8kW h^{-1} \times 10h \times \$0.2 = \$16$$

$$C_l = n \times c_l = 1 \times \$32 = \$32$$

Energy consumption: **120 kW h-1;**

Water consumption: **2t;**

NaCl consumption: **0.5t;**

Cost of energy: **\$24;**

Cost of material (NaCl, water): **\$44.14;**

Total costs: **\$100.14.**

After this process, about 400kg of spent LiCoO<sub>2</sub> cathode scraps and 70.1 kg of Al foil can be obtained in this study.

### **Step 2: Vapor thermal:**

One set of industrial reactor (Internal Electric Heater) (P=50Kw, capacity = 1000L, maximum working pressure 5 Mpa, heating temperature 300 °C, ) was used to selectively recovery LiCoO<sub>2</sub>. In this process, the obtained spent LiFePO<sub>4</sub> cathode

scraps were treated in batches of 4 by the reactor, which means the device needs to work 4 times every day. The working time including temperature rise and hold 240 °C is 4 hour every time. About 1.2 ton of water and 0.24 t of NH<sub>4</sub>Cl was consumed.

$$E_e = P \times t \times c_e = 50kW h^{-1} \times 4h \times \$0.2 \times 4 = \$160$$

$$C_{water} = m \times c_{water} = 1.2 \times 0.92\$ = 1.104\$$$

$$C_{NH4Cl} = m \times c_{NH4Cl} = 0.24 \times 144\$ = 34.56\$$$

$$C = n \times c_l = 1 \times \$32 = \$32$$

Energy consumption: **800 kW h-1**;

Water consumption: **1.2t**;

NH<sub>4</sub>Cl consumption: **0.24t**;

Cost of energy: **\$160**;

Cost of material (NH<sub>4</sub>Cl, water): **\$35.664**;

Total costs: **\$227.664**.

### **Step 3: Filtration and Drying:**

**Filtering requirement:** A set of frame filter (P = 5Kw, maximum capacity = 30 m<sup>2</sup>/per)

is needed to work for 2 h. About 1 ton of water is consumed.

$$E_e = P \times t \times c_e = 5kW h^{-1} \times 2h \times \$0.2 = \$2$$

$$C_{water} = m \times c_{water} = 2 \times 0.92\$ = 1.84\$$$

$$C_l = n \times c_l = 1 \times \$32 = \$32$$



**Drying requirement:** A conveyor drier ( $P = 10\text{Kw}$ , maximum capacity = 200kg/per,)

is needed to work for 4h to dry  $\text{Co}_3\text{O}_4$  powder.

$$E_e = P \times t \times c_e = 10\text{kW h}^{-1} \times 4\text{h} \times \$0.2 = \$8$$

Energy consumption: **50 kW h-1;**

Water consumption: **2t;**

Cost of energy: **\$10;**

Cost of material (water): **\$1.84;**

Total costs: **\$43.84.**

After this process, about 324.7 kg of  $\text{Co}_3\text{O}_4$  powders and 600 Kg ( $13.9 \text{ g L}^{-1} \text{ Li}^+$ ) filtrate can be obtained in this study.

#### **Step 4: Precipitation, filtration, and Drying:**

**Precipitation:** A set of glass lining reactors (Internal Electric Heater) ( $P = 5\text{Kw}$ , maximum capacity =500 L/per) are needed to respectively work for 1h including temperature rise and hold. About 1 ton water was consumed. 0.127 t of  $\text{Na}_2\text{CO}_3$  is added into filtrate to precipitation  $\text{Li}_2\text{CO}_3$ .

$$E_e = P \times t \times c_e = 5\text{kW h}^{-1} \times 1\text{h} \times \$0.2 \times 1.2 = \$1.2$$

$$C_{\text{water}} = m \times c_{\text{water}} = 1 \times 0.92\$ = 0.92\$$$

$$C_{\text{Na}_2\text{CO}_3} = m \times c_{\text{Na}_2\text{CO}_3} = 0.127 \times 265\$ = 33.655\$$$

$$C_l = n \times c_l = 1 \times \$32 = \$32$$

**Filtering requirement:** A set of frame filter ( $P = 5\text{Kw}$ , maximum capacity =  $30\text{ m}^2/\text{per}$ )

is needed to work for 2 h. About 1 ton of water is consumed.

$$E_e = P \times t \times c_e = 5\text{kW h}^{-1} \times 2\text{h} \times \$0.2 = \$2$$

$$C_{\text{water}} = m \times c_{\text{water}} = 1 \times 0.92\$ = 0.92\$$$

After, **149.1 Kg of  $\text{Li}_2\text{CO}_3$**  is obtained.

**Drying requirement:** A conveyor drier ( $P = 10\text{Kw}$ , maximum capacity =  $200\text{kg}/\text{per}$ .)

is needed to work for 4h to dry  $\text{Li}_2\text{CO}_3$  powder.

$$E_e = P \times t \times c_e = 10\text{kW h}^{-1} \times 4\text{h} \times \$0.2 = \$8$$

Energy consumption: **56 kW h-1;**

Water consumption: **2t;**

$\text{Na}_2\text{CO}_3$  consumption: **0.127t;**

Cost of energy: **\$11.2;**

Cost of material (water): **\$1.84;**

Cost of material ( $\text{Na}_2\text{CO}_3$ ): **\$33.655**

Total costs: **\$78.695.**

After this process, about 149.1 kg of  $\text{Li}_2\text{CO}_3$  powders can be obtained in this process. Thus, the whole energy consumption ( $E_T$ ), the total cost of energy ( $C_E$ ), the cost of the industrial raw material ( $C_M$ ), and the total labor cost  $C_L$  in this study can be calculated:

$$E_T = 120 + 800 + 50 + 56 = 1026 \text{ kW h}^{-1}$$

$$C_E = 1026 \text{ kW h}^{-1} \times \$0.2 = \$205.2$$

$$C_M = 1.84\$ + 1.104\$ + 1.84\$ + 1.84\$ = 6.624\$$$

$$C_L = 64\$ + 32\$ + 32\$ + 32\$ = 160\$$$

The economic benefit for recycling spent LiCoO<sub>2</sub> battery by vapor thermal approach mainly comes from recycled Co<sub>3</sub>O<sub>4</sub>, Li<sub>2</sub>CO<sub>3</sub>, and Al foil. As shown in **Tab. S9**, the total raw material cost was about **\$578.14**, and **324.7 kg of Co<sub>3</sub>O<sub>4</sub>**, **149.1 kg of Li<sub>2</sub>CO<sub>3</sub>**, and **70.1 kg of Al foil** could be recycled from one ton of spent LiCoO<sub>2</sub> batteries. Detailed economic benefit analysis indicates a **\$16542.82** revenue by vapor thermal approach.

**Table. S9** Economic and energy consumption prospective of the vapor thermal approach

| Material                        |                    | Price (\$) | Process (t) | Economic Benefit | Total revenue |
|---------------------------------|--------------------|------------|-------------|------------------|---------------|
| Spent battery                   | LiCoO <sub>2</sub> | 461/t      | 1           | -461             |               |
| Water                           |                    | 0.92/t     | 7.2         | -6.624           |               |
| NaCl                            |                    | 84.6/t     | 0.5         | -42.3            | 16542.82      |
| NH <sub>4</sub> Cl              |                    | 144/t      | 0.24        | -34.56           |               |
| Na <sub>2</sub> CO <sub>3</sub> |                    | 265/t      | 0.127       | -33.655          |               |
| Electricity                     |                    | 0.2/kWh    | 1026        | -205.2           |               |

|                                 |         |        |          |
|---------------------------------|---------|--------|----------|
| Labor wage                      | 32/day  | 5      | -160     |
| Li <sub>2</sub> CO <sub>3</sub> | 15384/t | 0.1491 | 2293.75  |
| Co <sub>3</sub> O <sub>4</sub>  | 46152/t | 0.3247 | 14976.78 |
| Al                              | 3076/t  | 0.0701 | 215.63   |

## References

1. E. Fan, L. Li, J. Lin, J. Wu, J. Yang, F. Wu and R. Chen, *ACS Sustainable Chem. Eng.*, 2019, **7**, 16144-16150.
2. X. Qu, H. Xie, X. Chen, Y. Tang, B. Zhang, P. Xing and H. Yin, *ACS Sustainable Chem. Eng.*, 2020, **8**, 6524-6532.
3. Y. Tang, B. Zhang, H. Xie, X. Qu, P. Xing and H. Yin, *J. Power Sources*, 2020, **474**.
4. Y. Tang, X. Qu, B. Zhang, Y. Zhao, H. Xie, J. Zhao, Z. Ning, P. Xing and H. Yin, *J. Clean Prod.*, 2021, **279**, 123633.
5. S. He, B. P. Wilson, M. Lundström and Z. Liu, *J. Clean Prod.*, 2020, **268**, 122299.
6. S. He and Z. Liu, *Waste Manag.*, 2020, **108**, 28-40.
7. S. He and Z. Liu, *Waste Manag.*, 2020, **113**, 105-117.
8. J. Xiao, B. Niu and Z. Xu, *J. Clean Prod.*, 2020, **277**, 122718.
9. J. Xiao, R. Gao, B. Niu and Z. Xu, *J. Hazard. Mater.*, 2021, **407**, 124704.
10. J. Xiao, B. Niu, Q. Song, L. Zhan and Z. Xu, *J. Hazard. Mater.*, 2021, **404**, 123947.
11. C. Yang, J. Zhang, Z. Cao, Q. Jing, Y. Chen and C. Wang, *ACS Sustainable Chem. Eng.*, 2020, **8**, 15732-15739.
12. Y. Chen, N. Liu, F. Hu, L. Ye, Y. Xi and S. Yang, *Waste Manag.*, 2018, **75**, 469-476.
13. H. Wang, K. Huang, Y. Zhang, X. Chen, W. Jin, S. Zheng, Y. Zhang and P. Li, *ACS Sustainable Chem. Eng.*, 2017, **5**, 11489-11495.
14. H. Ku, Y. Jung, M. Jo, S. Park, S. Kim, D. Yang, K. Rhee, E.-M. An, J. Sohn and K. Kwon, *J. Hazard. Mater.*, 2016, **313**, 138-146.
15. K. Meng, Y. Cao, B. Zhang, X. Ou, D.-m. Li, J.-f. Zhang and X. Ji, *ACS Sustainable Chem. Eng.*, 2019, **7**, 7750-7759.
16. C. Wu, B. Li, C. Yuan, S. Ni and L. Li, *Waste Manag.*, 2019, **93**, 153-161.

17. X. Zheng, W. Gao, X. Zhang, M. He, X. Lin, H. Cao, Y. Zhang and Z. Sun, *Waste Manag.*, 2017, **60**, 680-688.
18. S. Wang, C. Wang, F. Lai, F. Yan and Z. Zhang, *Waste Manag.*, 2020, **102**, 122-130.
